# Supplementary material for: Outbreak of Tularemia in a Group of Hunters in Germany in 2018—Kinetics of Antibody and Cytokine Responses
Source: PubMed Central journal article supplement (PMC7690809; doi:10.3390/microorganisms8111645), 2020-10-23
Supplement: microorganisms-08-01645-s001.pdf [file microorganisms-08-01645-s001.pdf]

**Supplementary Table S1. Cytokines and chemokines measured in the study.**

| <b>Mediator</b>                                               | <b>Abbreviation</b> | <b>Detection Limit (pg/mL)</b> |
|---------------------------------------------------------------|---------------------|--------------------------------|
| eotaxin                                                       | N/A                 | 4.7                            |
| fibroblast growth factor basic                                | FGFb                | 24.2                           |
| granulocyte colony-stimulating factor                         | G-CSF               | 19.6                           |
| granulocyte-macrophage colony stimulating factor              | GM-CSF              | 6.7                            |
| interferon- $\alpha$                                          | IFN $\alpha$        | 5.6                            |
| interferon- $\gamma$                                          | IFN $\gamma$        | 5.2                            |
| Interleukin 1 $\beta$                                         | IL-1 $\beta$        | 4.1                            |
| Interleukin 2                                                 | IL-2                | 4.3                            |
| Interleukin 4                                                 | IL-4                | 4.8                            |
| Interleukin 5                                                 | IL-5                | 4.1                            |
| Interleukin 6                                                 | IL-6                | 4.4                            |
| Interleukin 8                                                 | IL-8                | 1.5                            |
| Interleukin 9                                                 | IL-9                | 4.0                            |
| Interleukin 10                                                | IL-10               | 3.3                            |
| Interleukin 12p70                                             | IL-12p70            | 4.2                            |
| Interleukin 13                                                | IL-13               | 3.3                            |
| Interleukin 17A                                               | IL-17A              | 3.4                            |
| Interleukin 17F                                               | IL-17F              | 4.5                            |
| Interleukin 21                                                | IL-21               | 6.4                            |
| Interleukin 22                                                | IL-22               | 19.5                           |
| interferon- $\gamma$ -induced protein-10                      | IP-10               | N/A                            |
| monocyte chemotactic protein-1                                | MCP-1               | N/A                            |
| macrophage inflammatory protein-1 $\alpha$                    | MIP-1 $\alpha$      | 5.0                            |
| macrophage inflammatory protein-1 $\beta$                     | MIP-1 $\beta$       | 5.2                            |
| platelet-derived growth factor bb                             | PDGF-BB             | N/A                            |
| regulated on activation, normal T cell expressed and secreted | RANTES              | N/A                            |
| tumor necrosis factor- $\alpha$                               | TNF $\alpha$        | 4.4                            |
| vascular endothelial growth factor                            | VEGF                | 27.0                           |

N/A, not available or not applicable.
